# Supplementary material for: Nonclassical Monocytes Are Prone to Migrate Into Tumor in Diffuse Large B-Cell Lymphoma
Source: PubMed Central journal article supplement (PMC8716558; doi:10.3389/fimmu.2021.755623), 2021-12-16

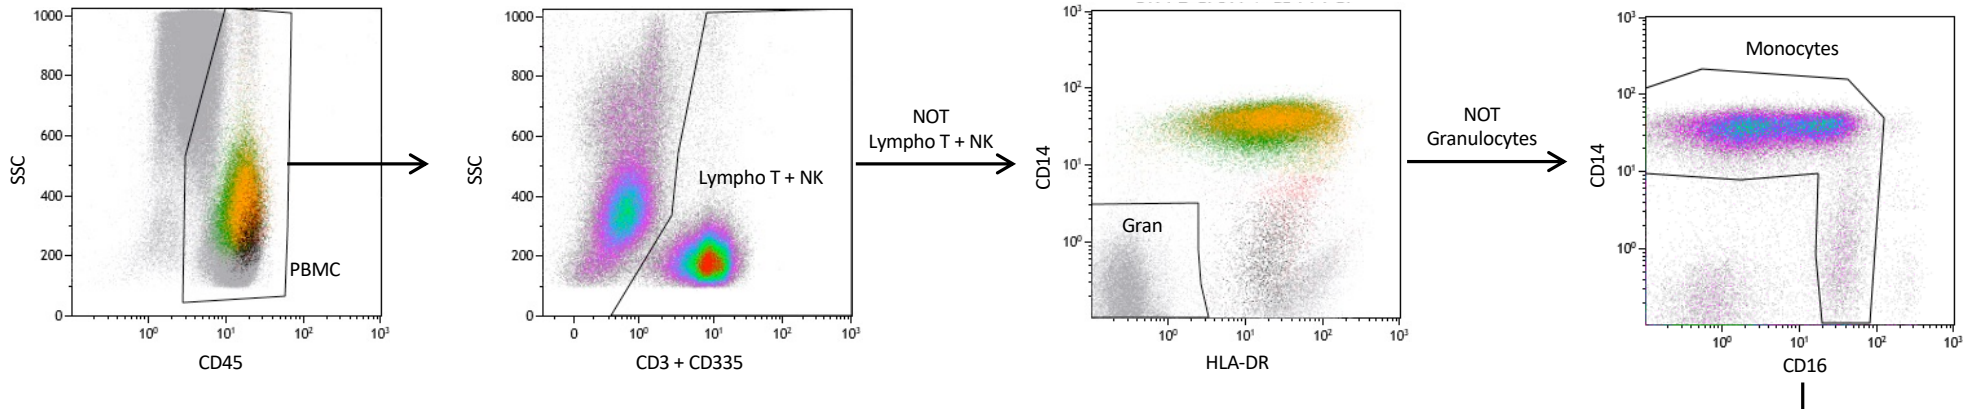

### M-MDSC

CD3<sup>neg</sup> CD335<sup>neg</sup> CD45<sup>pos</sup>  
CD14<sup>pos</sup> HLA-DR<sup>low</sup>

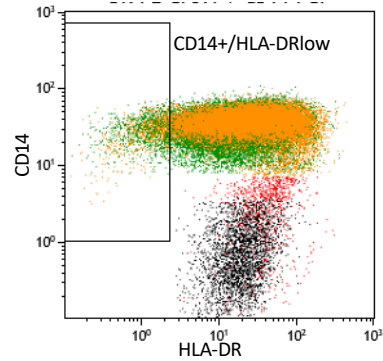

### iMO

CD3<sup>neg</sup> CD335<sup>neg</sup> CD45<sup>pos</sup>  
CD14<sup>high</sup> CD16<sup>pos</sup>

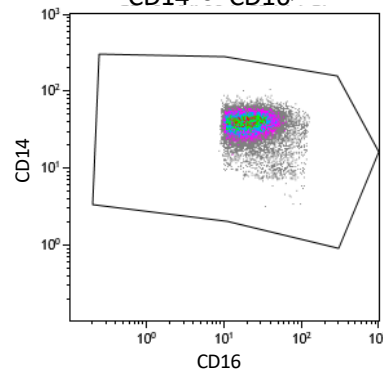

NOT  
CD14+/HLA-DR<sup>low</sup>  
CD14+ CD16-  
CD14<sup>lo</sup> CD16-

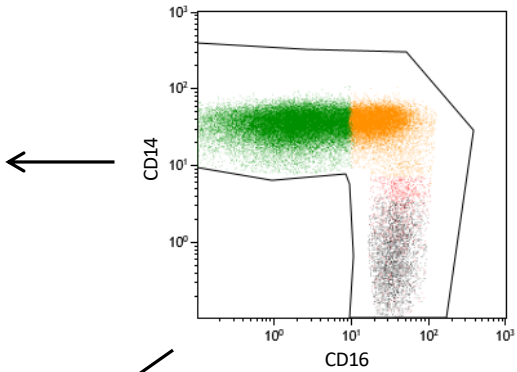

### cMO

CD3<sup>neg</sup> CD335<sup>neg</sup> CD45<sup>pos</sup>  
CD14<sup>high</sup> CD16<sup>neg</sup>

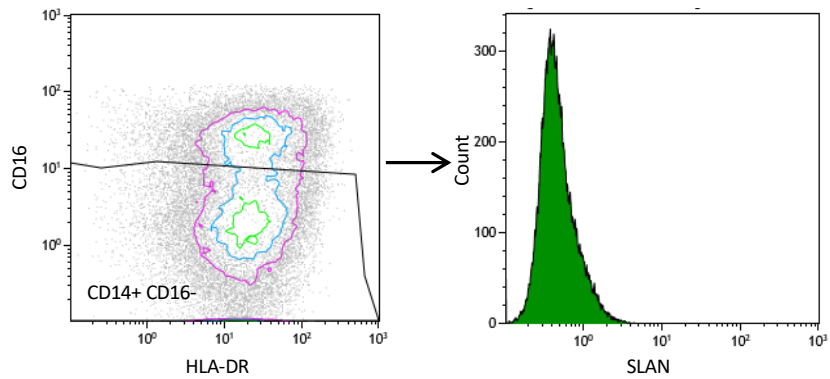

### ncMO

CD3<sup>neg</sup> CD335<sup>neg</sup> CD45<sup>pos</sup>  
CD14<sup>low</sup> CD16<sup>pos</sup> Slan<sup>pos</sup> and Slan<sup>neg</sup>

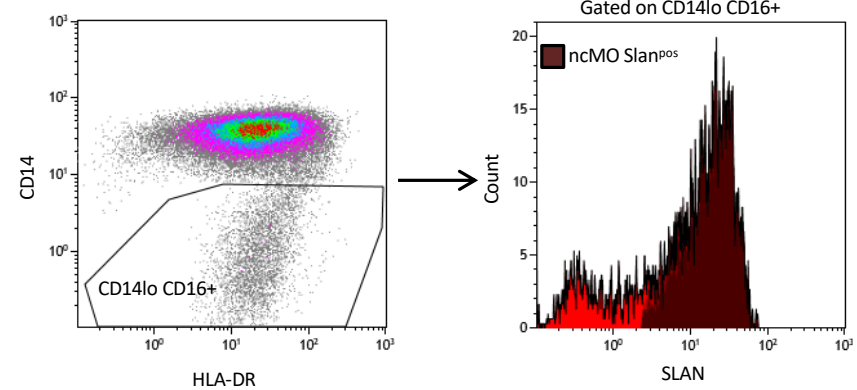

Supplement: Image_1.pdf [file Image_1.pdf]
